# Supplementary material for: Galectin-3 Impairment of MYCN-Dependent Apoptosis-Sensitive Phenotype Is Antagonized by Nutlin-3 in Neuroblastoma Cells
Source: PubMed Central journal article supplement (PMC3494673; doi:10.1371/journal.pone.0049139), 2012-11-09
Supplement: pone.0049139.s004.pdf [file pone.0049139.s004.pdf]

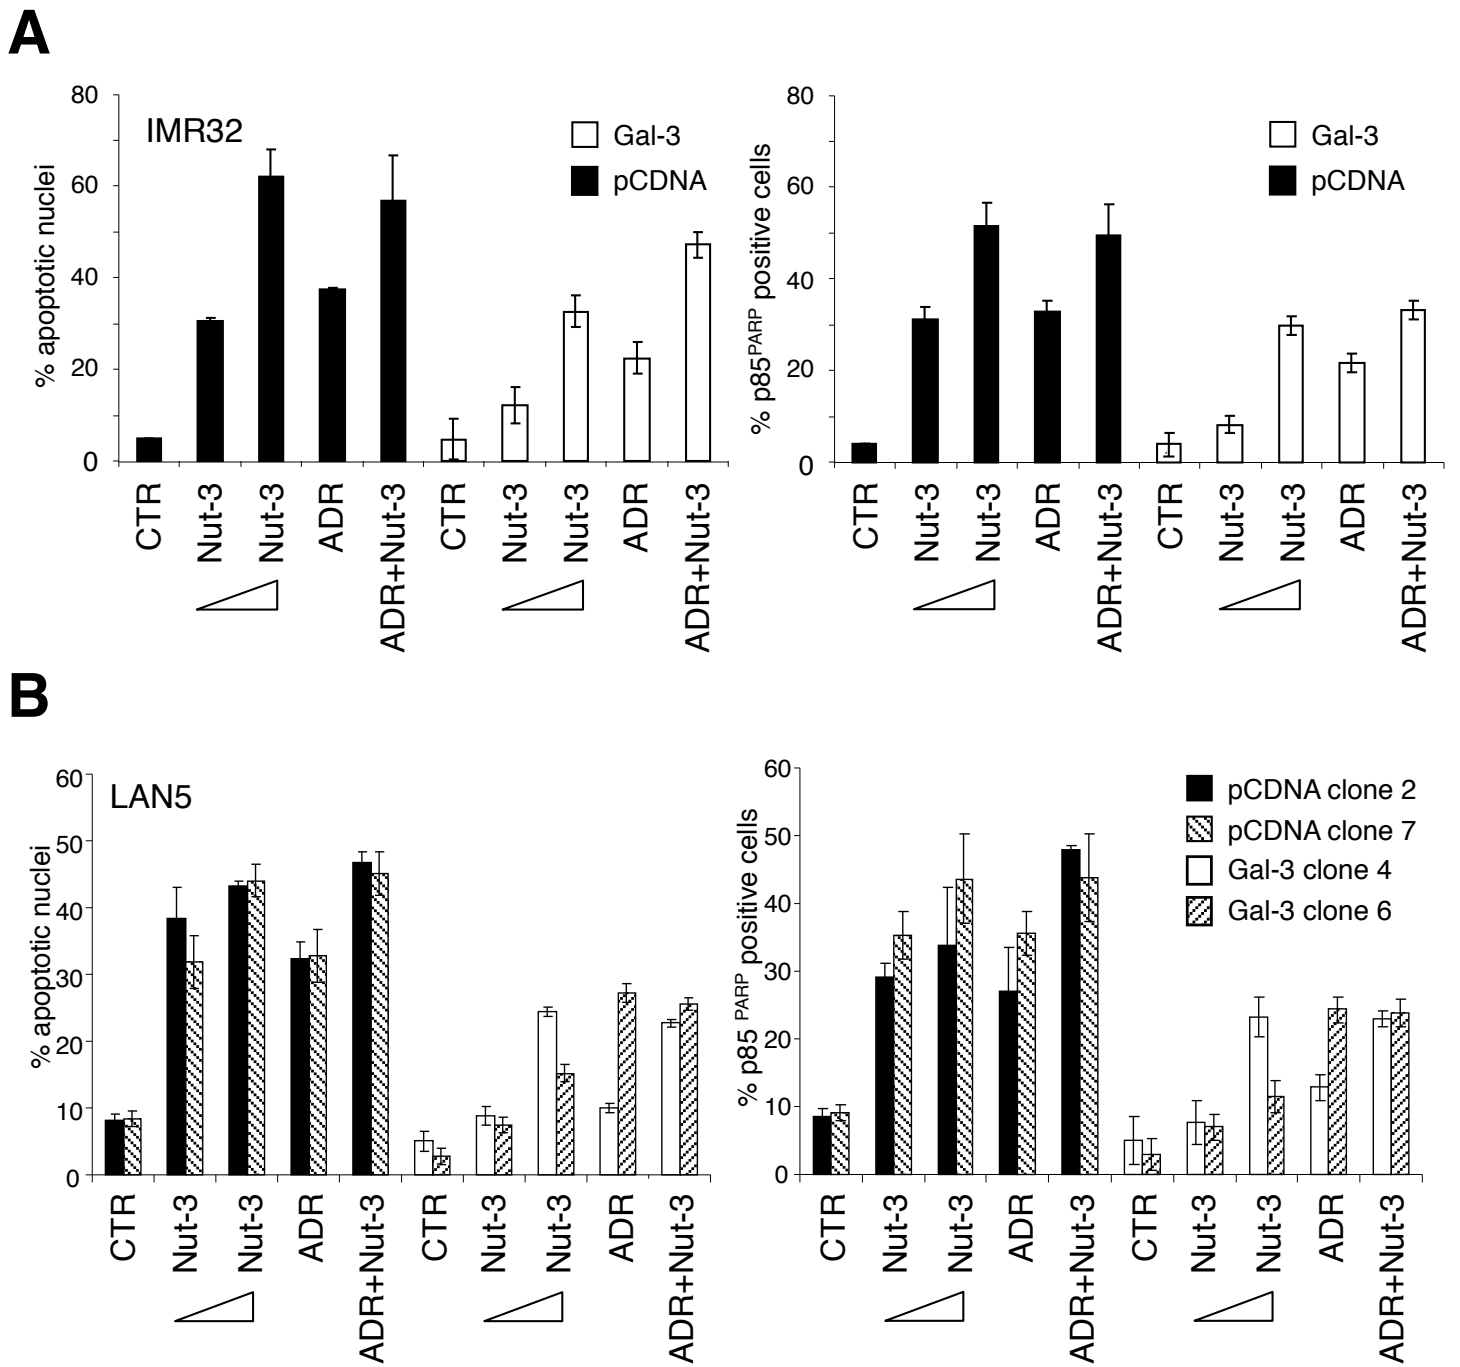

**Fig. S4**
